# Supplementary material
Source: Springer Nature journal article supplement (https://www.springermedizin.de/resource/supplementary/12883_2011_503_MOESM1_ESM.pdf/9455584)
Supplement: MOESM1 [file 9455584]

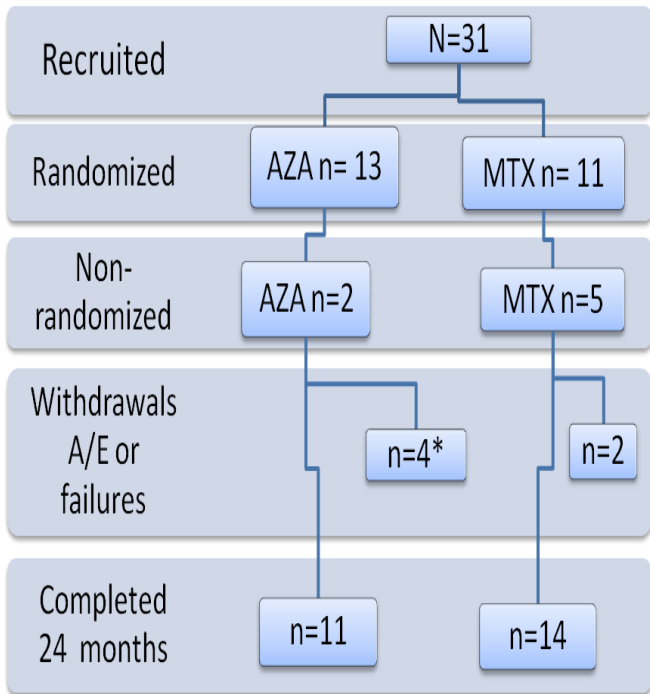

Recruited

N=31

Randomized

AZA n= 13

MTX n= 11

Non-randomized

AZA n=2

MTX n=5

Withdrawals  
A/E or  
failures

n=4\*

n=2

Completed  
24 months

n=11

n=14
